# Supplementary material
Source: PubMed Central journal article supplement (PMC8781478)
Supplement: ptc-2019-0013_appendix2.pdf [file ptc-2019-0013_appendix2.pdf]

## APPENDIX 2: COORDINATOR SURVEY

1. Please select your university affiliation.
  - a) Dalhousie University
  - b) McGill University
  - c) McMaster University
  - d) Queen's University
  - e) University of Alberta
  - f) University of British Columbia
  - g) Université Laval
  - h) University of Manitoba
  - i) Université de Montréal
  - j) University of Ottawa
  - k) University of Saskatchewan
  - l) Université de Sherbrooke
  - m) University of Toronto
  - n) Western University
  - o) Université du Québec à Chicoutimi

### **THIS SECTION AIMS TO IDENTIFY THE SUPPORT GIVEN TO CLINICAL SUPERVISORS REGARDING TEACHING AND ASSESSING THE ADVOCATE ROLE DURING CLINICAL PLACEMENTS.**

2. Do you offer training to clinical supervisors to prepare them to supervise the physiotherapy students from your university? (*Note that we are referring to general training – i.e., not specifically related to the advocate role.*)
  - a) Yes
  - b) No
3. Is the training mandatory – i.e., do supervisors have to follow this training before being allowed to supervise physiotherapy students?
  - a) Yes
  - b) No
4. Does the training cover specific content on how to TEACH the advocate role during clinical placements?
  - a) Yes. Please specify a brief description of content and/or format used (e.g., documentation, simulation, presentation) in this section of the training session.
  - b) No
5. Does the training cover specific content on how to ASSESS the advocate role during clinical placements?
  - a) Yes. Please specify a brief description of content and/or format used (e.g., documentation, simulation, presentation) in this section of the training session.
  - b) No
6. Do supervisors specifically ASSESS the advocate role during the clinical placement (e.g., placement report)?
  - a) Yes
  - b) No
7. Are supervisors provided with a specific tool to guide them in their ASSESSMENT of the advocate role in their students?
  - a) Yes. Please specify the name of the standardized instrument or brief description of the tool provided.
  - b) No

**THIS SECTION AIMS TO IDENTIFY HOW YOU ASSESS, AS CLINICAL COORDINATORS, THE ADVOCATE ROLE IN YOUR STUDENTS.**

8. How do you identify that students have reached the minimum threshold required for the role of advocate, at the end of all of their clinical placements – i.e., at the end of their studies?

**THE FOLLOWING SECTION AIMS TO IDENTIFY WHICH FACTORS INFLUENCE YOUR EXPERIENCE OF TEACHING AND ASSESSING THE ADVOCATE ROLE.**

*We are looking to identify facilitators and barriers at a personal, university, or professional level. To give you an idea of elements to consider for each of these levels, some examples of subjects are provided from our literature review, acting as functional definitions: (1) personal – i.e., relating to your own knowledge, values, or personal/professional experiences; (2) university – i.e., relating to your university or program; (3) professional – i.e., relating to the physiotherapy profession or its supporting organizations; and (4) other – i.e., any other element that may influence your experience. Note that this is a non-exhaustive list of subjects, so feel free to add anything that may be missing.*

9. What factors act as a facilitator to teaching and assessing the advocate role?
10. What factors act as a barrier to teaching and assessing the advocate role?
11. Do you have any solutions or suggestions to counteract the above-mentioned barriers? *(Depending on the type of barriers mentioned above, your suggestions may be specific to yourself or your university program OR they may be broader (i.e., targeting the profession as a whole.)*
12. In conclusion, do you have any comments regarding the advocate role or this survey?
