# Supplementary material
Source: PubMed Central journal article supplement (PMC8781478)
Supplement: ptc-2019-0013_appendix3.pdf [file ptc-2019-0013_appendix3.pdf]

### **APPENDIX 3: SUPERVISOR INTERVIEW**

The main goal of this interview is to talk about your experience of teaching and assessing the advocate role with physiotherapy students during clinical placements. **To start off, to better understand where you're coming from, let's start with a little about you:**

1. How many years have you been in practice?
2. In what kind of clinical environments have you worked, and what types of patients have you worked with?
3. How often have you supervised students and from what level were those students (beginners or about to graduate)?

**Now let's explore the advocate role a little bit.**

4. How would you describe the advocate role?
  - a) Prompt on the four levels of advocacy described in Section 5 of the Essential Competency Profile (2009).
5. What is your experience of the advocate role?
  - a) Prompt about their clinical work and/or other professional activities.
6. Do you feel that you put into practice all the competencies related to the advocate role?

**Now let's move on to teaching and assessment practices for students.**

7. What opportunities exist for students during their placement to put the advocate role into practice?
8. How do you, as a clinical instructor, facilitate students developing this role?
9. Do you ever mention the fact that what they are doing is advocacy OR talk directly about the advocate role?
10. Do you feel the students understand that what they are doing is "advocacy"?
11. Do you officially assess the advocate role during clinical placements?
12. What criteria do you use to assess their performance of the advocate role?
  - a) Prompt to discuss what they want to see in their students apart from the criteria of their assessment tool.
13. Does your university offer you support in any way, to either mentor or assess the advocate role in students?
14. Is there anything that universities, generally speaking, could do to better support clinical instructors?

**Now, we're going to have a look at facilitators and barriers and solutions to teaching and assessing the advocate role.** You can answer from your own personal experiences or from your observation of other physiotherapists. We are looking at all kinds of factors and solutions, from personal factors to institutional ones, so feel free to expand!

15. What factors do you feel facilitate your ability to teach and assess the advocate role?
  - a) Prompt to explore factors from their personal experience (personal, professional, training, etc.), from their work setting (institution, health system, provincial regulations, types of patients or work environment, etc.), from their university (students, support, etc.), from the profession (clinicians, professional bodies and associations, etc.), and other factors.
16. What factors do you feel act as barriers to your ability to teach and assess the advocate role?
  - a) Prompt to explore factors from their personal experience (personal, professional, training, etc.), from their work setting (institution, health system, provincial regulations, types of patients or work environment, etc.), from their university (students, support, etc.), from the profession (clinicians, professional bodies and associations, etc.), and other factors.

17. What solutions exist to overcome the mentioned barriers?
  - a) When discussing barriers, make sure to take notes to cover solutions related to the barriers mentioned by the clinical instructor.
18. Do you have any other suggestions or solutions so that we can become better mentors for our students during clinical placements?
19. As a final question, for clinicians who feel that they don't do advocacy work as part of their practice, because it's not their job, they don't have time, there are too many constraints, etc., how would you get those clinicians to understand what the role is and its importance, so that they are better able to put the role into practice, and therefore become better at teaching and assessing that role with their students?

Thank you very much. Any final comments or elements that you wanted to discuss?
